# Supplementary material
Source: Springer Nature journal article supplement (https://www.springermedizin.de/resource/supplementary/40478_2014_9146_MOESM1_ESM.pdf/25665604)
Supplement: MOESM1 [file 25665604]

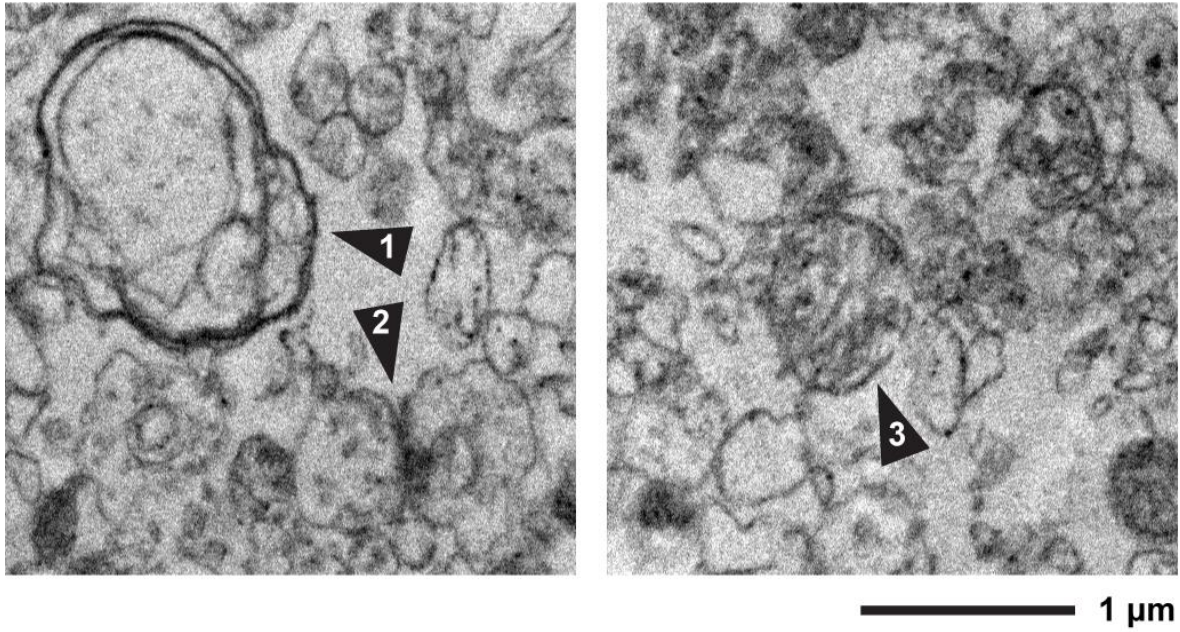

**Supplementary Figure 1.** Transmission electron micrographs of human synaptoneuroosomes isolated from non-demented controls, with arrowheads marking the presence of (1) myelin fragment; (2) intact synapse; (3) mitochondrion.

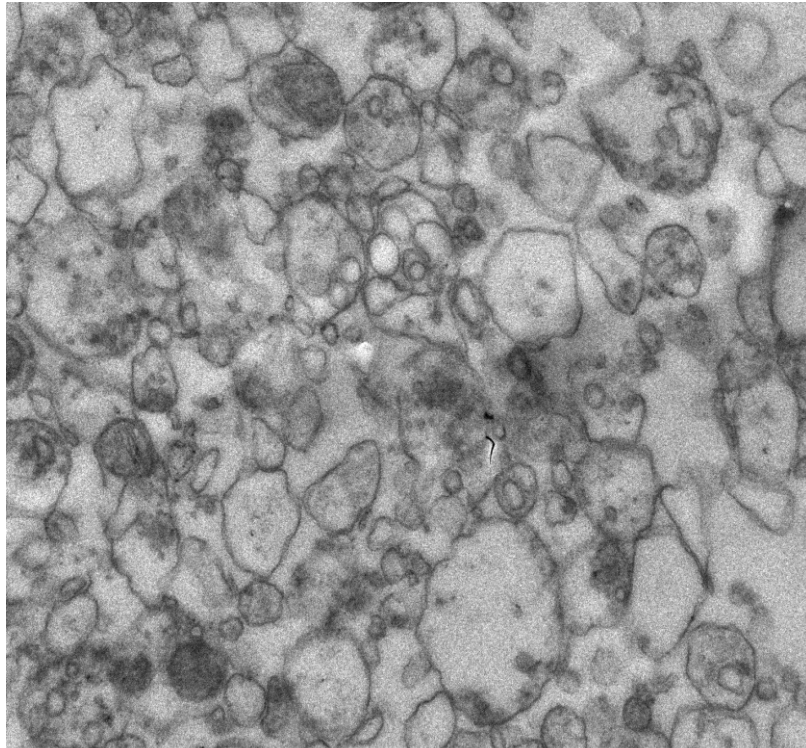

500 nm

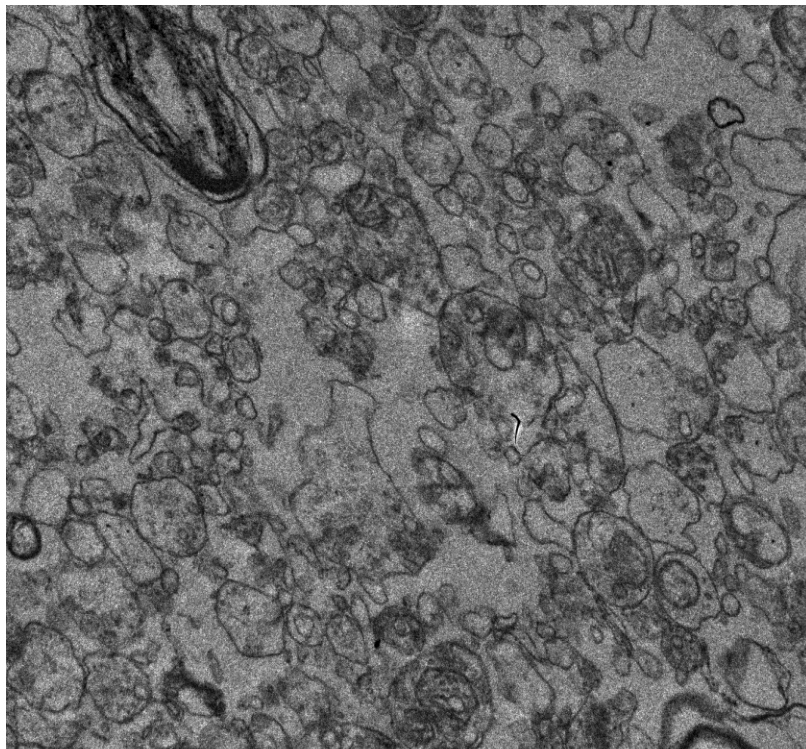

500 nm

**Supplementary Figure 2.** Transmission electron micrographs of synaptoneuroosomes isolated from Alzheimer's disease subjects. No visible fibrils were observed.

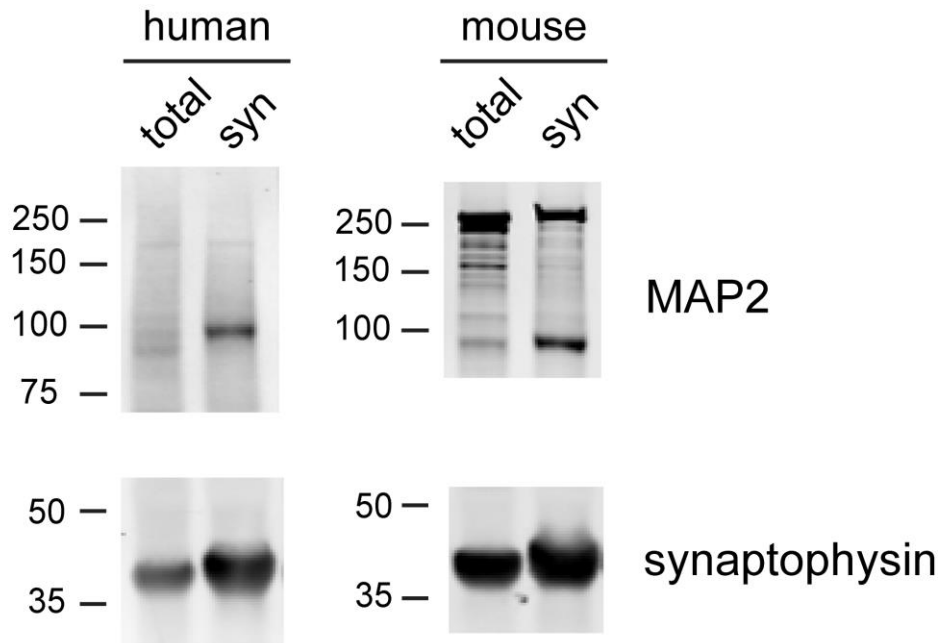

**Supplementary Figure 3.** Immunoblotting with mouse anti-MAP2 and mouse anti-synaptophysin against total and synaptoneurosomes (syn) extracts from human controls and mouse brain tissues. Low molecular weight MAP2 (<100 kDa) is highly enriched inside both human and mouse neuronal synapses.
